# Supplementary material
Source: PubMed Central journal article supplement (PMC2909314)

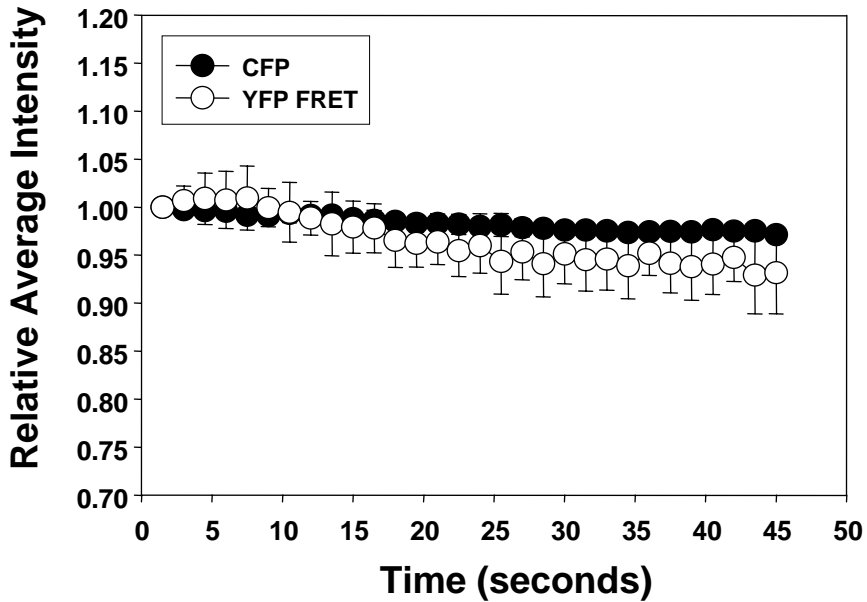

Supplement: supp_122_15_2597__1.pdf [file supp_122_15_2597__1.pdf]

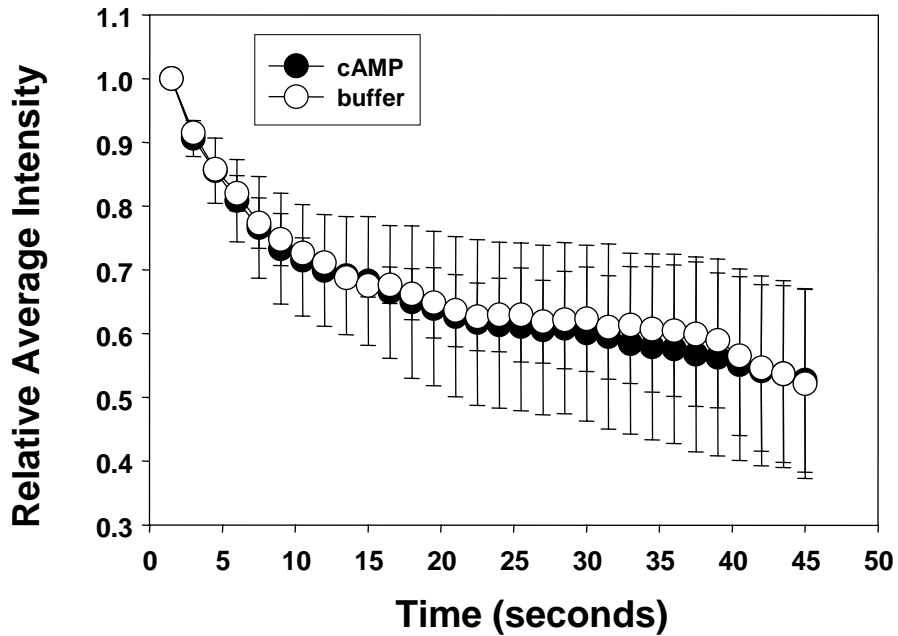

Supplement: supp_122_15_2597__2.pdf [file supp_122_15_2597__2.pdf]

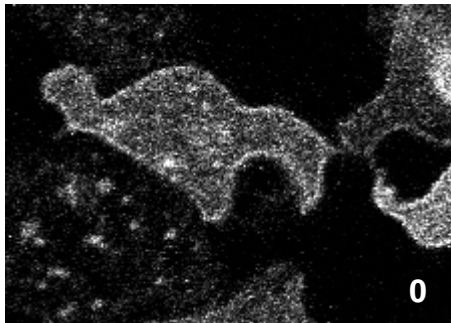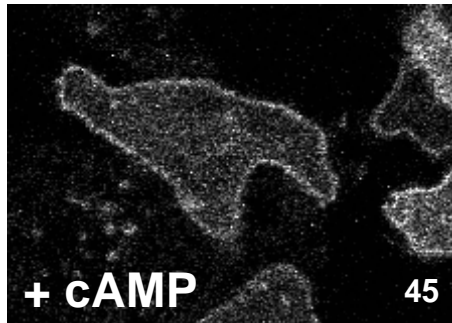

Supplement: supp_122_15_2597__3.pdf [file supp_122_15_2597__3.pdf]

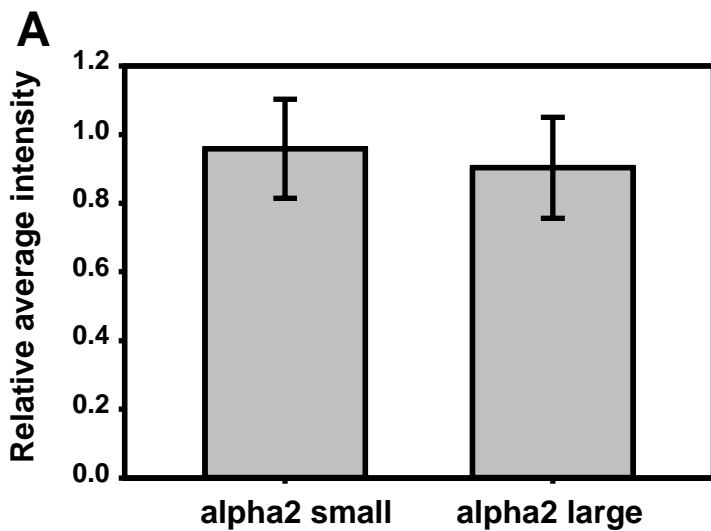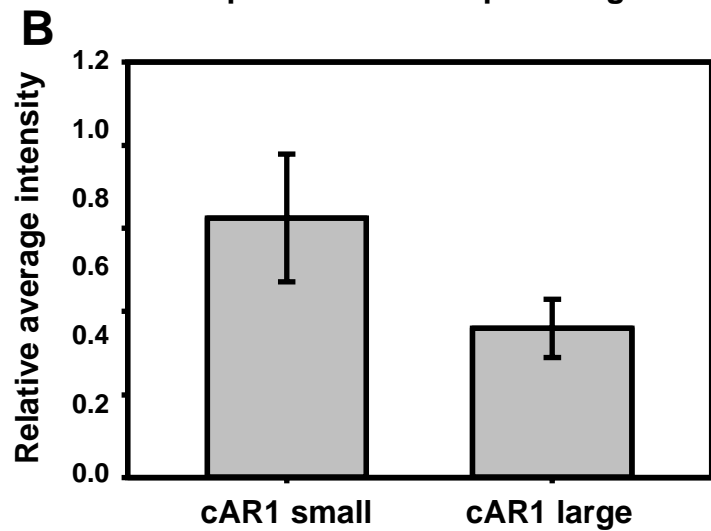

Supplement: supp_122_15_2597__4.pdf [file supp_122_15_2597__4.pdf]

**A**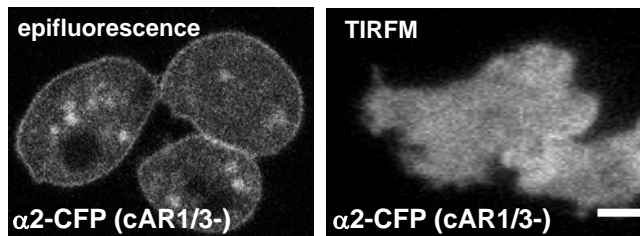**B**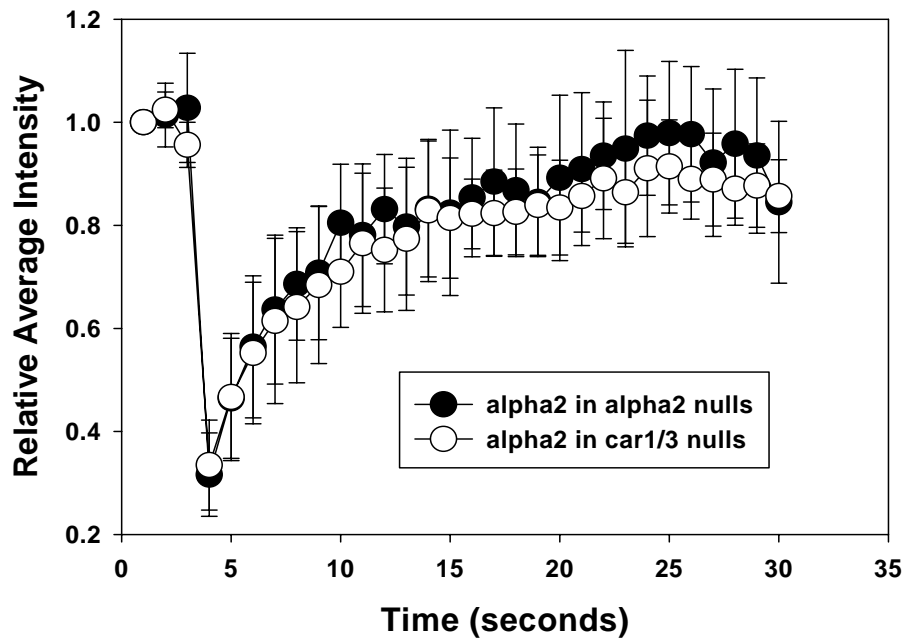

Supplement: supp_122_15_2597__5.pdf [file supp_122_15_2597__5.pdf]
